# Supplementary material for: Variation Overtime among Patients of the Six Methadone Maintenance Treatment Clinics in Thai Nguyen from 2011 to 2015
Source: Hindawi journal article supplement (doi:10.1155/2018/9081968), 2018-08-07
Supplement: f1 [file 9081968.f1.docx]

|  |
| --- |
| **Figure 1: Cumulative hazard of exiting (quitting + death) of MMT program in every year** |
|  | |
| **Figure 2: Cumulative hazard of re-enrolment in every year after quitting program in 740 patients** | |

|  |
| --- |
| **Figure 3 Rate of retention among 2,567 patients between 2011 and 2015** |
|  |
| **Figure 4: Risk of quitting rate by year of treatment** |

**Table 1: Demographic characteristics of patients who registered for MMT from (12/05/2011-06/09/2015) at the six Methadone Maintain Treatment clinics in Thai Nguyen**

| **Characteristic** |  | **n** | **%** |
| --- | --- | --- | --- |
| **Gender** | Male | 2,536 | 98.8 |
| Female | 31 | 1.2 |
| **Age group** | ≤29 | 257 | 10.0 |
| 30-49 | 2,058 | 80.2 |
| ≥50 | 252 | 9.8 |
| **MMT clinics** | Dong Hy | 429 | 16.7 |
| Dai Tu | 498 | 19.4 |
| Phu Luong | 185 | 7.2 |
| Pho Yen | 558 | 21.7 |
| Tuc Duyen | 569 | 22.2 |
| Trung Thanh | 328 | 12.8 |
| **Total** |  | **2,567** | **100** |
